# Supplementary material for: A label-free aptasensor for highly sensitive ATP detection by using exonuclease I and oligonucleotide-templated fluorescent copper nanoparticles
Source: Royal Society of Chemistry journal article supplement (doi:10.1039/c7ay00424a), 2017-01-01
Supplement: c7ay00424a1.pdf [file c7ay00424a1.pdf]

## Electronic Supplementary Information

### **A Label-Free Aptasensor for Highly Efficient ATP Detection by Using Exonuclease I and Oligonucleotide-templated Fluorescent Copper Nanoparticles**

Qiyong Cai<sup>a,b</sup>, Jia Ge<sup>a</sup>, Huihui Xu<sup>b</sup>, Lin Zhang<sup>a,\*</sup>, Yalei Hu<sup>a</sup>, Zhongming Huang<sup>a</sup>, and Zhaohui Li<sup>a,b,\*</sup>

<sup>a</sup> *College of Chemistry and Molecular Engineering, Zhengzhou University, Zhengzhou 450001, China*

<sup>b</sup> *Institute of Chemical Biology and Nanomedicine, Hunan University, Changsha 410082, China*

---

\* Corresponding authors. Tel.: +86-371-67783007.

E-mail address: zhaohui.li@zzu.edu.cn (Z. H. Li), zhanglin@zzu.edu.cn (L. Zhang).

**Fig. S1.** Typical TEM image of oligonucleotide-templated copper nanoparticles.

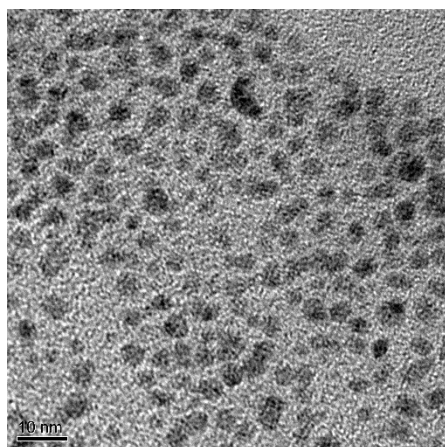

**Table S1** Comparison of different methods for ATP determination.

| <b>Method</b>                                           | <b>Range</b>        | <b>LOD</b>   | <b>Reference</b> |
|---------------------------------------------------------|---------------------|--------------|------------------|
| MB <sup>1</sup> -based assay                            | 0.8 –80 $\mu$ M     | 0.5 $\mu$ M  | [1]              |
| GO <sup>2</sup> -based molecular beacon assay           | 5 – 2500 $\mu$ M    | 2 $\mu$ M    | [2]              |
| AuNPs <sup>3</sup> -based aptamer                       | 4.4 – 132.7 $\mu$ M | 0.6 $\mu$ M  | [3]              |
| UCNPs <sup>4</sup> -based biosensor                     | 0.1 – 0.75 mM       | 20 $\mu$ M   | [4]              |
| Sandwich-type FRET <sup>5</sup> assay                   | 2 –16 $\mu$ M       | 1.70 $\mu$ M | [5]              |
| ]Aptamer–target recognition based aptasensor            | 62.5 – 2500 $\mu$ M | 1.45 $\mu$ M | [6]              |
| AIE <sup>6</sup> -active probe                          | 0 – 1 mM            | 24 $\mu$ M   | [7]              |
| Microfluidic paper analysis                             | 0.5 – 10 $\mu$ M    | 1 $\mu$ M    | [8]              |
| GOx signaling trigger                                   | 10 – 100 $\mu$ M    | 10 $\mu$ M   | [9]              |
| Fe <sup>3+</sup> - fluorescence carbon dots             | 0.5 – 50 $\mu$ M    | 0.48 $\mu$ M | [10]             |
| Zn <sup>2+</sup> -Cysteine capped CdTe QDs <sup>7</sup> | 5 – 50 $\mu$ M      | 2.07 $\mu$ M | [11]             |
| Aptamer fluorescence anisotropy sensors                 | 1 – 200 $\mu$ M     | 1 $\mu$ M    | [12]             |
| Oligonucleotide-based CuNPs system                      | 1 – 80 $\mu$ M      | 0.5 $\mu$ M  | This work        |

<sup>1</sup>MB, Molecular Beacon

<sup>2</sup>GO, Graphene Oxide

<sup>3</sup>AuNPs, Gold nanoparticles

<sup>4</sup>UCNPs, Upconversion nanoparticles

<sup>5</sup>FRET, Fluorescence resonance energy transfer

<sup>6</sup>AIE, Aggregation-induced emission

<sup>7</sup>QDs, Quantum dots

## Reference

- [1] S.J. Zhen, L.Q. Chen, S.J. Xiao, Y.F. Li, P.P. Hu, L. Zhan, L. Peng, E.Q. Song, C.Z. Huang, *Anal. Chem.* 82 (2010) 8432-8437.
- [2] Y. He, Z.-G. Wang, H.-W. Tang, D.-W. Pang, *Biosens. Bioelectron.* 29 (2011) 76-81.
- [3] J. Wang, L. Wang, X. Liu, Z. Liang, S. Song, W. Li, G. Li, C. Fan, *Adv. Mater.* 19 (2007) 3943-3946.
- [4] K. Song, X. Kong, X. Liu, Y. Zhang, Q. Zeng, L. Tu, Z. Shi, H. Zhang, *Chem. Commun.* 48 (2012) 1156-1158.
- [5] X. He, Z. Li, X. Jia, K. Wang, J. Yin, *Talanta*, 111 (2013) 105-110.
- [6] Y. Tan, X. Zhang, Y. Xie, R. Zhao, C. Tan, Y. Jiang, *Analyst*, 137 (2012) 2309-2312.
- [7] K. Ma, H. Wang, H. Li, S. Wang, X. Li, B. Xu, W. Tian, *Sens. Actuators. B. Chem.* 230 (2016) 556-558.
- [8] S.-Q. Jin, S.-M. Guo, P. Zuo, B.-C. Ye, *Biosens. Bioelectron.* 63 (2015) 379-383.
- [9] S. Sitaula, S.D. Branch, M.F. Ali, *Chem. Commun.* 48 (2012) 9284-9286.
- [10] Z. Zhan, J. Cai, Q. Wang, Y. Su, L. Zhang, Y. Lv, *Luminescence*, 31 (2016) 626-632.
- [11] F. Shi, Y. Li, Z. Lin, D. Ma, X. Su, *Sens. Actuators. B. Chem.* 220 (2015) 433-440.
- [12] Q. Zhao, Q. Lv, H. Wang, *Biosens. Bioelectron.* 70 (2015) 188-193.
